# Supplementary material for: Risk factors associated with self‐reported Q fever in Australian wildlife rehabilitators: Findings from an online survey
Source: PubMed Central journal article supplement — Zoonoses Public Health. 2022 Oct 12;70(1):69–80. doi: 10.1111/zph.13002 (PMC10091799; doi:10.1111/zph.13002), 2022-10-12
Supplement: ZPH-70-69-s001.pdf [file ZPH-70-69-s001.pdf]

(S1) Results of univariable analysis for risk factors associated with self-reported Q fever among 287 unvaccinated Australian wildlife rehabilitators participating in a nationwide online survey conducted in 2018.

| Variable Name and Description                                                                 | Total number | Self-reported Q fever disease |     | Odds ratio | 95% LCL        | P-value |
|-----------------------------------------------------------------------------------------------|--------------|-------------------------------|-----|------------|----------------|---------|
|                                                                                               |              | Yes                           | No  |            |                |         |
| <b>Age</b>                                                                                    | 287          |                               |     |            |                | 0.185   |
| ≤50                                                                                           |              | 3                             | 112 | 1          |                |         |
| >50                                                                                           |              | 10                            | 162 | 2.30       | 0.687 - 10.448 |         |
| <b>Education level</b>                                                                        | 287          |                               |     |            |                | 0.036   |
| University/Postgraduate                                                                       |              | 2                             | 118 | 1          |                |         |
| High School Level/TAFE or private college                                                     |              | 11                            | 156 | 4.16       | 1.090 - 27.213 |         |
| <b>Primary rehabilitated Australian wildlife at a veterinary clinic</b>                       | 287          |                               |     |            |                | 0.011   |
| No                                                                                            |              | 9                             | 256 | 1          |                |         |
| Yes                                                                                           |              | 4                             | 18  | 6.32       | 1.592 - 21.567 |         |
| <b>Rehabilitate kangaroos or wallabies</b>                                                    | 287          |                               |     |            |                | 0.185   |
| No                                                                                            |              | 2                             | 87  | 1          |                |         |
| Yes                                                                                           |              | 11                            | 187 | 2.56       | 0.657 - 16.486 |         |
| <b>No or non-ruminant occupational animals contact</b>                                        | 287          |                               |     |            |                | 0.014   |
| No                                                                                            |              | 8                             | 243 | 1          |                |         |
| Yes                                                                                           |              | 5                             | 31  | 4.90       | 1.407 - 15.647 |         |
| <b>Present at non-human mammalian births</b>                                                  | 287          |                               |     |            |                | 0.167   |
| No                                                                                            |              | 5                             | 137 | 1          |                |         |
| Have attended ruminant birth                                                                  |              | 6                             | 61  | 2.69       | 0.783- 9.675   | 0.113   |
| Have not attended ruminant birth                                                              |              | 2                             | 76  | 0.712      | 0.102 - 3.433  | 0.700   |
| <b>Kangaroos and/or wallabies living on the same property where wildlife is rehabilitated</b> | 287          |                               |     |            |                | 0.140   |
| No                                                                                            |              | 4                             | 141 | 1          |                |         |
| Yes                                                                                           |              | 9                             | 133 | 2.39       | 0.757 - 8.973  |         |
| <b>Domestic ruminants living on the same property where wildlife is rehabilitated</b>         | 287          |                               |     |            |                | 0.006   |
| No                                                                                            |              | 6                             | 223 | 1          |                |         |
| Yes                                                                                           |              | 7                             | 51  | 5.10       | 1.629 - 16.468 |         |

TAFE - Technical and Further Education, CI – confidence intervals
